# Supplementary material for: Acquired immunity of transgenic torenia plants overexpressing agmatine coumaroyltransferase to pathogens and herbivore pests
Source: PubMed Central journal article supplement — Sci Rep. 2012 Sep 24;2:689. doi: 10.1038/srep00689 (PMC3449287; doi:10.1038/srep00689), 2012-09-24
Supplement: srep00689-s1.pdf [file srep00689-s1.pdf]

# 1 **Supplementary Information**

## 2 3 **Acquired immunity of transgenic torenia plants overexpressing agmatine** 4 **coumaroyltransferase to pathogens and herbivore pests**

5  
6 Atsushi Muroi, Kenji Matsui, Takeshi Shimoda, Hirotomo Kihara, Rika Ozawa, Atsushi  
7 Ishihara, Masahiro Nishihara, Gen-ichiro Arimura

### 8 9 10 **Supp. Figure 1. Relative mRNA levels of *AtACT* in leaves of transgenic torenia.**

11 Transcript levels of genes in leaves of wild-type (WT), GUS-transgenic control and ThACT  
12 plants were normalized with respect to those of *ACT3* measured in the samples. Data  
13 represent the mean + standard errors ( $n = 4$ ).  
14

15 **Supp. Figure 2. Effects of HCAAs on mites.** (a) Survival of adult females (*T. ludeni*) on the  
16 leaves of wild-type (WT), ThACT3 and ThACT4 lines 3 days after inoculation. ns,  $P > 0.05$ ,  
17 GLM-test. (b) Total number of eggs (mean + SE) produced during 3 days. ns,  $P > 0.05$ ,  
18 one-way ANOVA.  
19

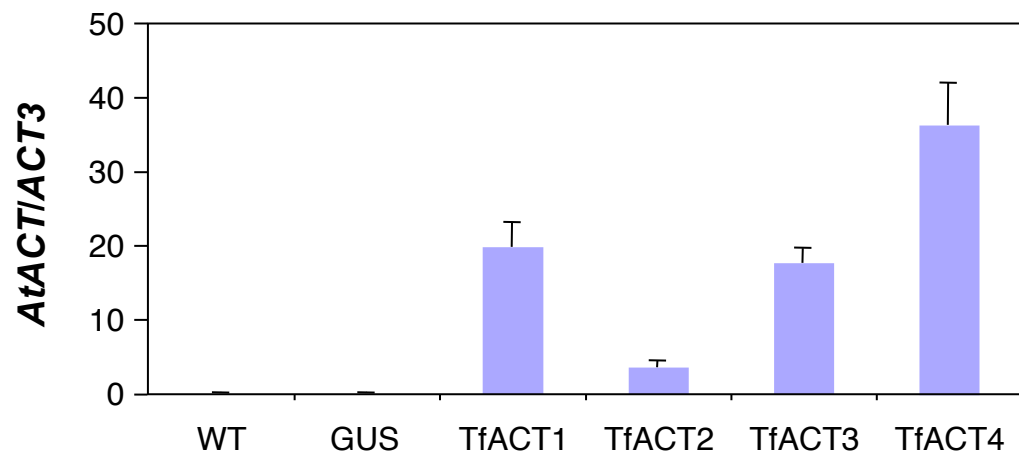

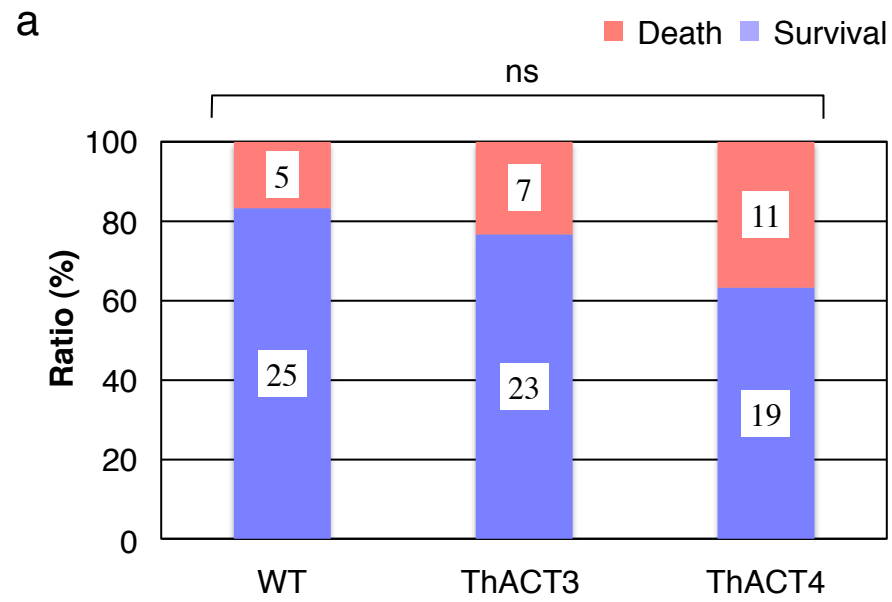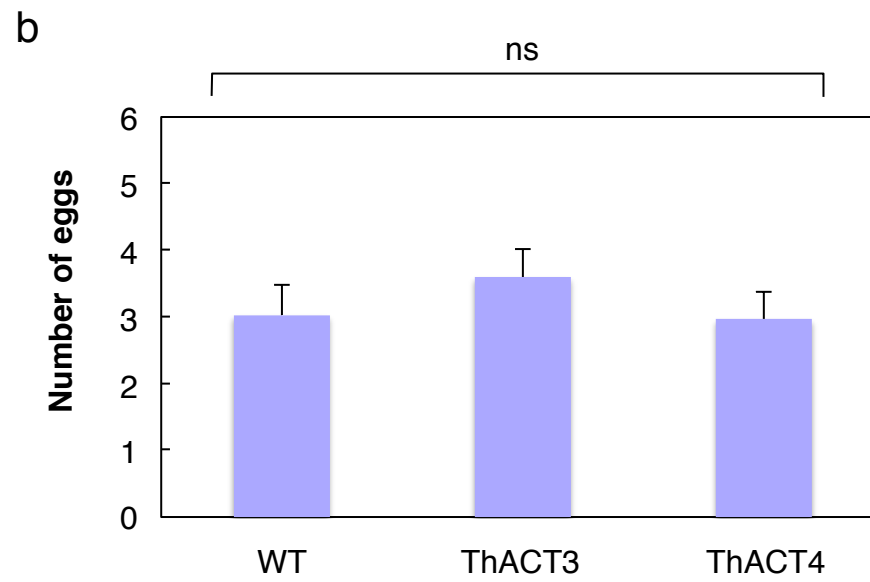

*Tetranychus ludeni*
